# Supplementary material for: Cytonemes coordinate asymmetric signaling and organization in the Drosophila muscle progenitor niche
Source: PubMed Central journal article supplement (PMC8897416; doi:10.1038/s41467-022-28587-z), 2022-03-04
Supplement: 41467_2022_28587_MOESM1_ESM.pdf [file 41467_2022_28587_MOESM1_ESM.pdf]

## SUPPLEMENTARY INFORMATION

### **Cytonemes coordinate asymmetric signaling and organization in the *Drosophila* muscle progenitor niche**

Akshay Patel<sup>1</sup>, Yicong Wu<sup>2</sup>, Xiaofei Han<sup>2</sup>, Yijun Su<sup>2,3</sup>, Tim Mangel<sup>4</sup>, Hari Shroff<sup>2,3</sup>,  
Sougata Roy<sup>1\*</sup>

<sup>1</sup> Department of Cell Biology and Molecular Genetics, University of Maryland, College Park, Maryland, USA

<sup>2</sup> Laboratory of High-Resolution Optical Imaging, National Institute of Biomedical Imaging and Bioengineering, National Institutes of Health, Bethesda, Maryland, USA

<sup>3</sup> Advanced Imaging and Microscopy Resource, National Institutes of Health, Bethesda, Maryland, USA

<sup>4</sup> Department of Biology, Laboratory for Biological Ultrastructure, University of Maryland, College Park, Maryland, USA

\* Correspondence: [sougata@umd.edu](mailto:sougata@umd.edu)

#### **This file includes**

Supplementary Figures 1-7

Supplementary Tables 1-3

References

**Supplementary Figure 1. Characterization of AMP localizations in the wing disc niche.**

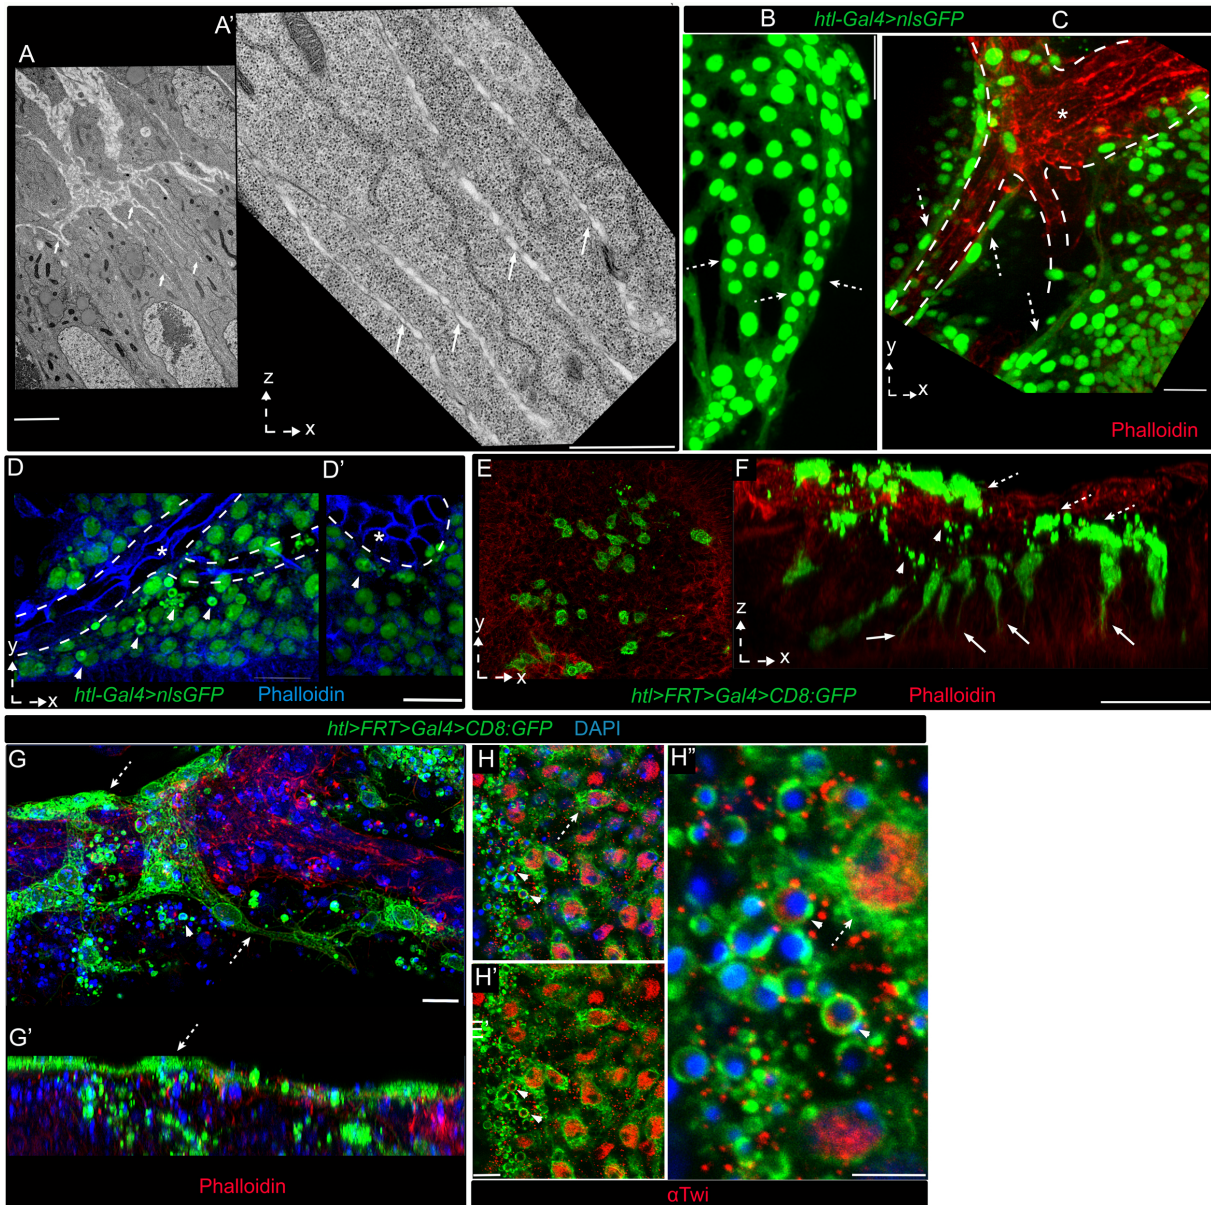

**A-A'** TEM sections of a  $w^{1118}$  wing disc showing cytoneme-like AMP projections within the intercellular space of the wing disc epithelium. **B-D'** XY sections showing diverse morphology of distal layer AMPs; arrowhead, small non-polar cells; dashed arrow, multinucleated elongated cells in juxtaposition to the trachea (\*, dashed lines, phalloidin stained) (also see Fig.11-K). **E-H''** Images of a wing disc harboring CD8:GFP-marked AMP clones; E, F, a single optical XY section; F, YZ view of a wing disc showing orthogonal (arrows) and lateral (dashed arrows) orientation of cells and cytonemes, occurring exclusively in proximal (arrow) and distal (dashed arrow) clones, respectively, relative to the disc plane; G-G', Clones of distal cells showing diverse morphologies, cell-cell adhesion, multi-nucleated assembly; red, phalloidin; H-H'', Twi-immunostained tissues showing small spherical cells, large elongated cells; dashed arrow, elongated cells; arrowhead, spherical cells. Scale bars: 20 $\mu$ m; 5 $\mu$ m (A); 2 $\mu$ m (A'); 20 $\mu$ m (B-F); 5 $\mu$ m (G-H'').

**Supplementary Figure 2. Characterization of AMP cytonemes.**

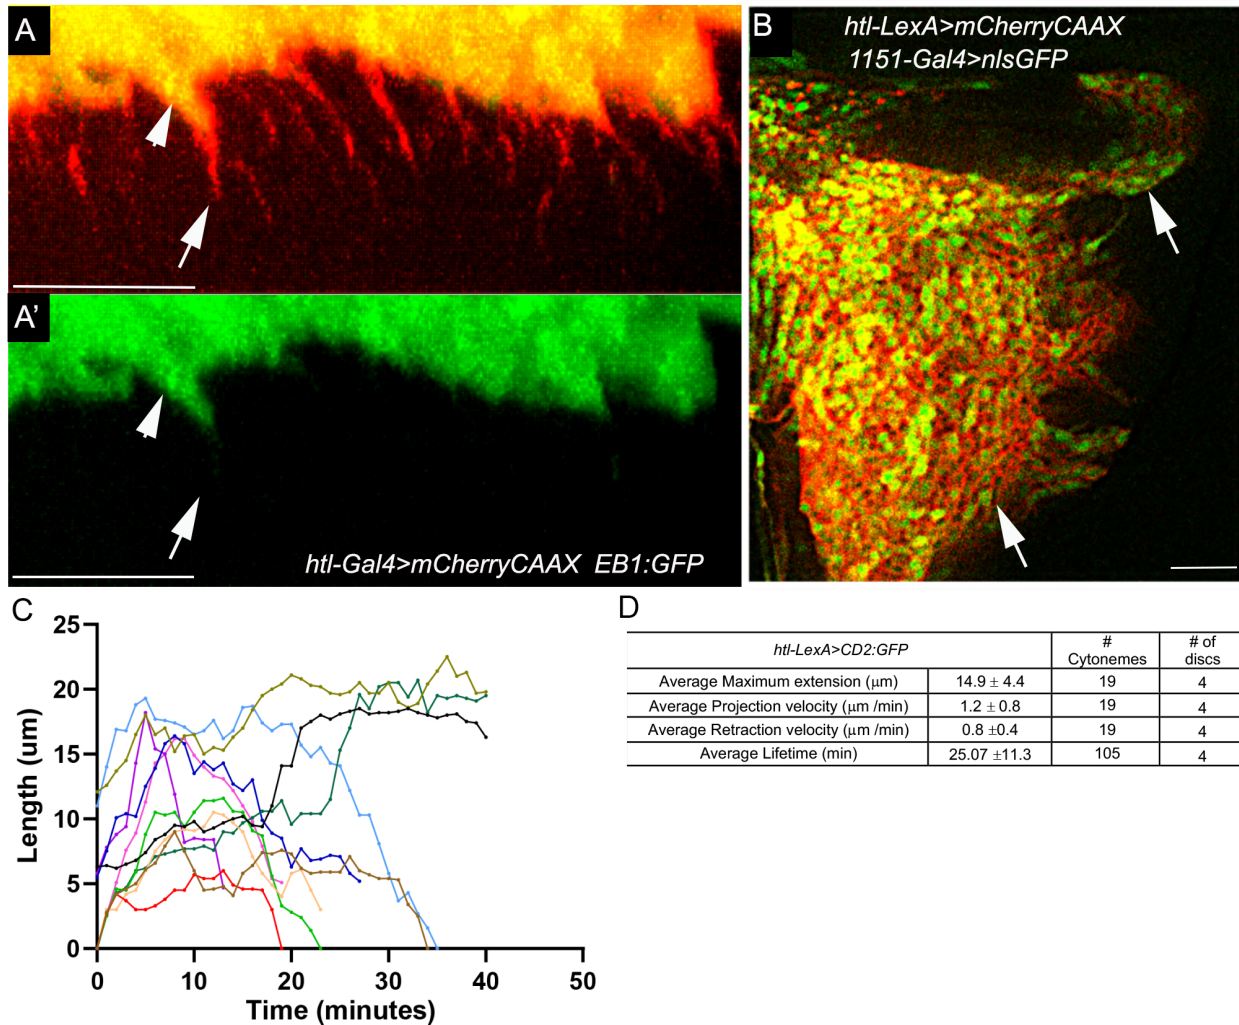

**A-A'** mCherryCAAX-marked AMPs expressing EB1:GFP lack GFP signal at the growing tips of orthogonal cytonemes; Arrowheads, cytonemes base; arrows, cytonemes shaft, and tip. **B** Highly specific pan-AMP expression pattern of *htl-LexA* binary transcription driver as verified by the overlap of expression pattern (arrow) over the known *1151-Gal4* pan-AMP driver. **C** Kymograph showing the dynamics of *htl-LexA>LexO-CD2:GFP* marked AMP cytonemes; each line graph indicates tracking of a single filopodium (4 discs). **D**. Analyses of cytoneme dynamics; average values  $\pm$  SD were derived from >19 cytonemes in four *ex vivo* cultured wing discs as indicated. Source data are provided as a Source Data file. Scale bars: 20 $\mu\text{m}$ .

**Supplementary Figure 3. Generation and expression of *pyr-Gal4*.**

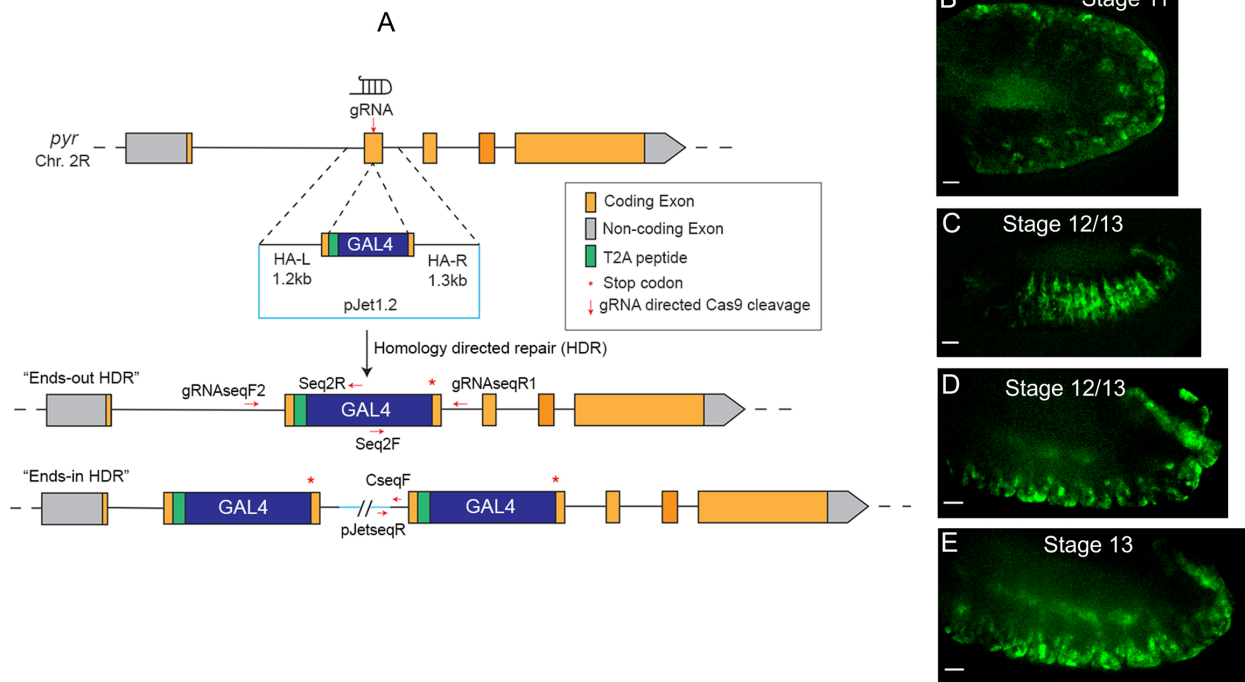

**A** Schematic illustration of CRISPR/Cas9-based genome editing to generate *pyr-Gal4* transgenic *Drosophila*; indicated primers were used to screen “ends-out” HDR lines (See Materials and Methods). **B-E** Different stages of embryos expressing CD8:GFP under *pyr-Gal4*; *pyr-Gal4* expression patterns matched previously published *pyr* mRNA *in situ* hybridization patterns, e.g., embryonic ectoderm near pericardial cell precursors (B), lateral view of segmental epithelial stripes (C), and ventral epithelial expression near proctodeum and stomodeum (D,E). Scale bars: 50µm.



**Supplementary Figure 4. Niche-specific signaling of Pyr:GFP and Ths:GFP.**

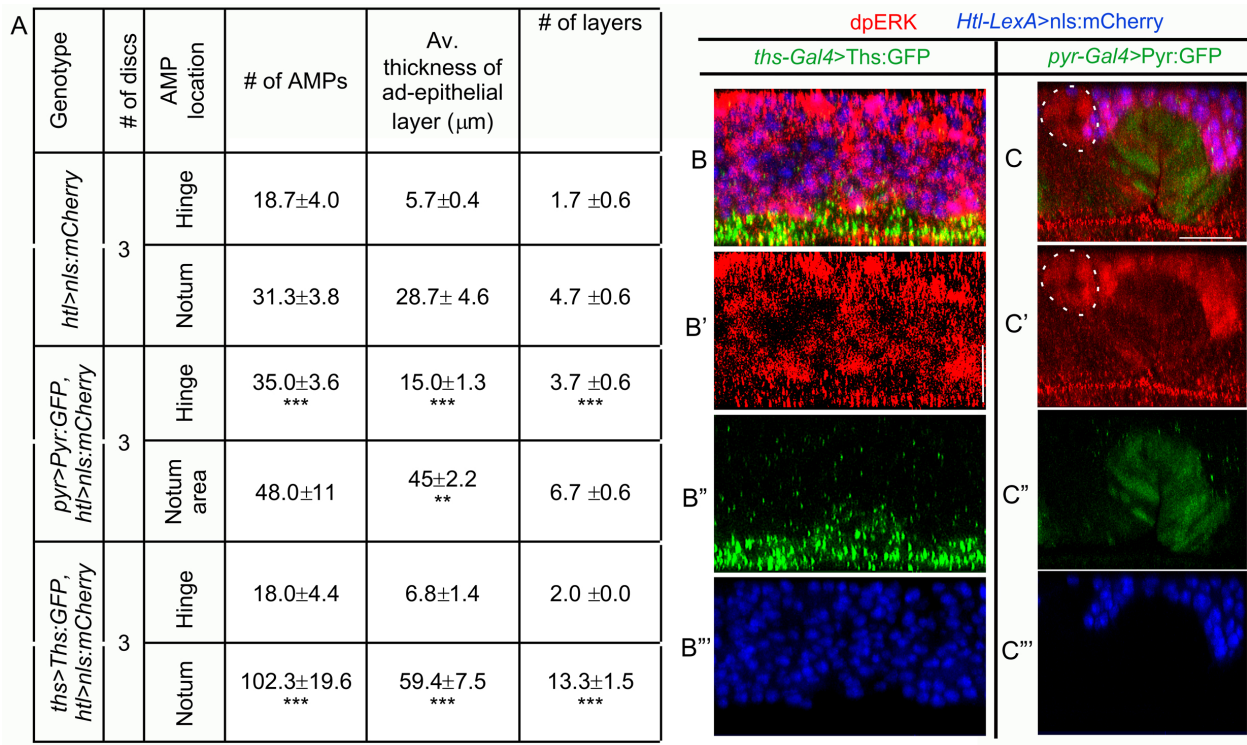

\*\* , p<0.05; \*\*\*, p<0.01 (t-test compared to *htl-LexA>nls:mCherry*).

**A-C'''** Wing discs expressing Pyr:GFP and Ths:GFP under *pyr-Gal4* and *ths-Gal4*, respectively. **A** Niche-specific change in the AMP pool size and stratified organization due to the Pyr:GFP and Ths:GFP expression from their respective sources; hinge, *pyr* source; notum, *ths*-source; Average values  $\pm$  SD shown; \*\*, p<0.05; \*\*\*, p<0.01 (unpaired two-tailed t-test). **B-C'''** Activation of dpERK (red) in all signal-receiving AMPs (blue); dashed circle, ASP. Scale bars: 20 $\mu\text{m}$ . Source data are provided as a Source Data file.

**Supplementary Figure 5. AMP homing on ectopic Pyr:GFP and Ths:GFP-expressing source.**

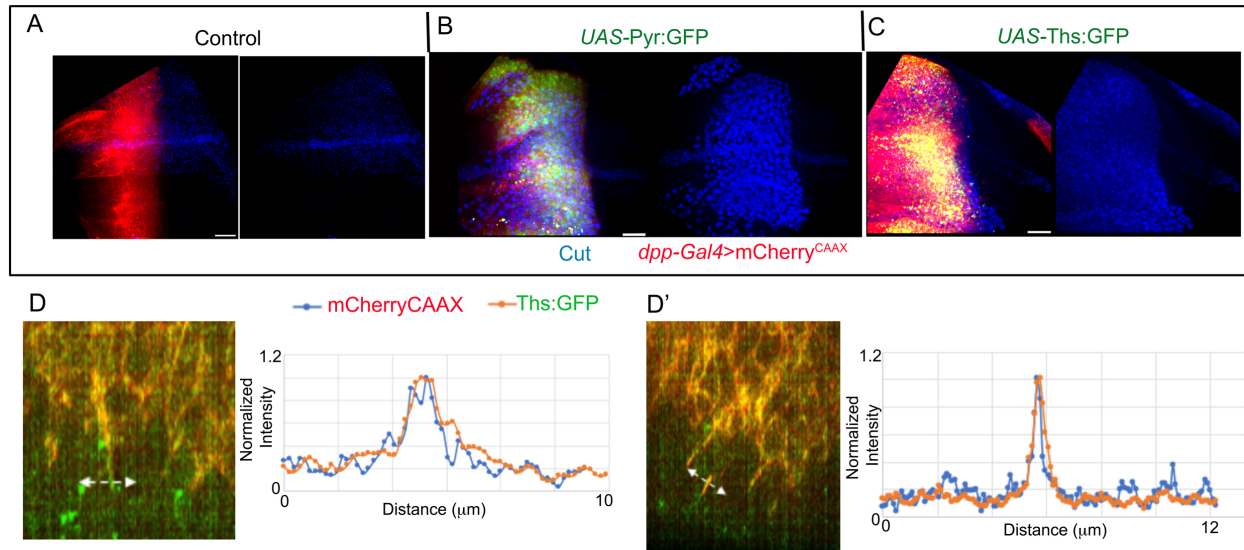

**A-C** The homing of AMPs (marked with  $\alpha$ Cut) over the disc *dpp*-source ectopically expressing of Pyr:GFP (B) or Ths:GFP (C); A, control disc region (*dpp-Gal4*, *UAS-mCherryCAAX/+*). **D-D'** Raw quantitation data from single XZ confocal slices from wing discs to assess colocalization of Ths:GFP produced from the *dpp* source in the disc pouch and mCherryCAAX-marked AMP cytonemes that invade into the ectopic niche. Genotypes: *dpp-Gal4/LexO-mCherryCAAX; htl-LexA/UAS-Ths:GFP* (D, D'). Source data are provided as a Source Data file. Scale bars: 20 $\mu$ m.

**Supplementary Figure 6. AMP cytonemes in the Wg-expressing disc source.**

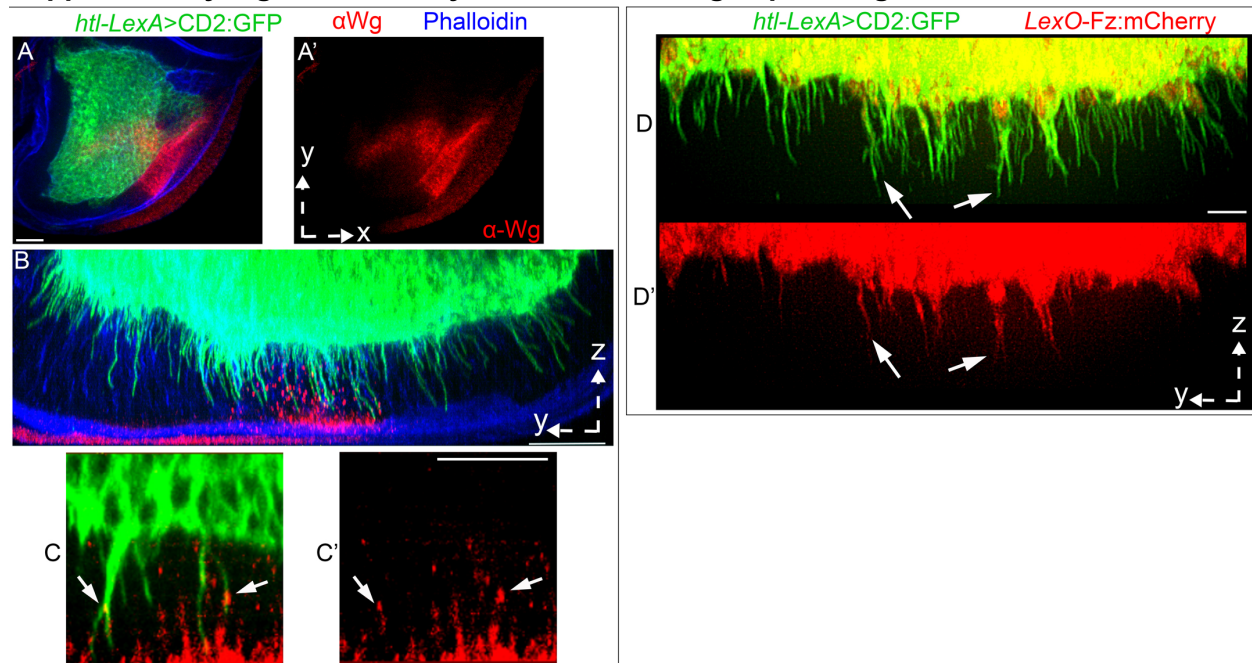

**A,A'** CD2:GFP-marked AMPs over the Wg-expressing ( $\alpha$ Wg; red) zone in the wing disc. **B,C** A group of AMP cytonemes that occupied the *ths*-expressing wing disc notum also receive Wg ( $\alpha$ Wg; red; arrow in C). **D, D'** CD2:GFP-marked AMPs expressing *LexO-Fz:mCherry* under *htl-LexA* showed Fz:Cherry-containing cytonemes specifically within the Wg-expressing zone (arrows). Scale bars: 20 $\mu$ m.

**Supplementary Figure 7. Non-autonomous effects of cytoneme-deficient AMPs on the wing disc.**

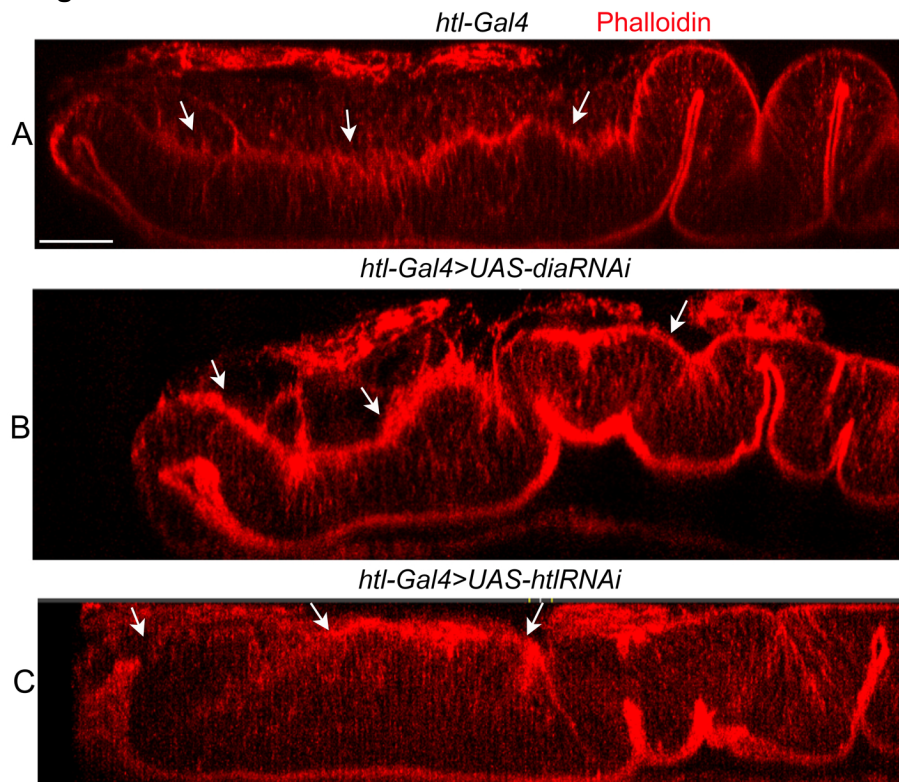

**A-C** YZ sections of wing imaginal discs, comparing identical region of discs derived from WT control (*htl-Gal4 X w*) and mutant flies that expressed either *dia-i* (B) or *htl-i* (C) under *htl-Gal4* (*htl-Gal4 X UAS-RNA-i*); red, phalloidin staining; arrows, basal surface of wing disc. Note that *dia-i* expressing syncytial AMPs caused abnormal disc morphology, probably to accommodate large-sized AMPs (also see Figure 4H-I). Similarly, the loss of disc-specific polarity of *htl-i*-expressing AMPs/AMP cytonemes caused smoothed disc surface and reductions in wing disc folds and actin-rich projections (also see Figure 5G-J). Scale bars: 20 $\mu$ m.



**SUPPLEMENTARY TABLES**

**Supplementary Table 1. Polarized AMP morphology and organization in niche**

|                  | Genotype                          | # of discs | AMP layer       | Av. major axis length orthogonal or oblique to the disc ( $\mu\text{m}$ ) $\pm$ SD | Av. major axis length parallel to the disc ( $\mu\text{m}$ ) $\pm$ SD | # of AMPs | Angle between major axes of AMPs and disc (av. deg.) $\pm$ SD | Av. thickness of the ad-epithelial layer ( $\mu\text{m}$ ) $\pm$ SD | # of layers $\pm$ SD |
|------------------|-----------------------------------|------------|-----------------|------------------------------------------------------------------------------------|-----------------------------------------------------------------------|-----------|---------------------------------------------------------------|---------------------------------------------------------------------|----------------------|
| EM               | <i>w<sup>-</sup></i>              | 2*         | p               | 7.1 $\pm$ 1.5                                                                      | 3.1 $\pm$ 0.6                                                         | 16        | 81.9 $\pm$ 7.8                                                | 21.5 $\pm$ 1.5                                                      | 4.0 $\pm$ 0.0        |
|                  |                                   |            | d               | 2.3 $\pm$ 1.1                                                                      | 8.7 $\pm$ 2.6                                                         | 11        | 11.7 $\pm$ 4.8                                                |                                                                     |                      |
| Light microscopy | <i>htl-Gal4&gt;nls:GFP</i>        | 5          | p               | 5.5 $\pm$ 1.2                                                                      | 2.9 $\pm$ 0.6                                                         | 125       | 83.4 $\pm$ 5.5                                                | 26.0 $\pm$ 1.2                                                      | 4.5 $\pm$ 0.7        |
|                  |                                   |            | p <sup>-1</sup> | 4.7 $\pm$ 1.1                                                                      | 3.7 $\pm$ 0.9                                                         | 119       | 77.2 $\pm$ 9.5                                                |                                                                     |                      |
|                  |                                   |            | d <sup>-1</sup> | 3.9 $\pm$ 1.1                                                                      | 4.3 $\pm$ 0.9                                                         | 84        | 21.0 $\pm$ 13.1                                               |                                                                     |                      |
|                  |                                   |            | d               | 3.2 $\pm$ 1.1                                                                      | 5.2 $\pm$ 1.1                                                         | 58        | 8.8 $\pm$ 6.0                                                 |                                                                     |                      |
|                  | <i>htl-Gal4&gt;nls:GFP, htl-i</i> | 3          | p               | 3.1 $\pm$ 0.8**                                                                    | 6.2 $\pm$ 1.9**                                                       | 33        | 6.0 $\pm$ 4.3**                                               | 5.9 $\pm$ 1.3**                                                     | 1.0 $\pm$ 0.0***     |

| <i>htl-Gal4&gt;nls:GFP, dia-i</i> | # of discs | Av. diameter of myoblasts ( $\mu\text{m}$ ) | Average thickness of myoblasts ( $\mu\text{m}$ ) | Average nuclei per chamber | Average number of chambers |
|-----------------------------------|------------|---------------------------------------------|--------------------------------------------------|----------------------------|----------------------------|
|                                   | 5          | 17.5 $\pm$ 10.9                             | 50.5 $\pm$ 12.6                                  | 6.5 $\pm$ 1.2              | 6.4 $\pm$ 1.1              |

**Note:** p, proximal. d, distal. p<sup>-1</sup>, one layer above p relative to the disc. d<sup>-1</sup>, one layer below d relative to the disc. Source data are provided as a Source Data file.

\*, 16 TEM sections from 2 wing discs.

\*\* , p <0.0001, unpaired two-tailed t-test compared to *htl>nls:GFP*.

\*\*\*, p = 0.0002, unpaired two-tailed t-test compared to *htl>nls:GFP*.

**Supplementary Table 2. Clonal analyses of AMP and AMP cytonemes**

| Genotype                  |                           | # of discs | Clone layer | # Clones * | Av. # disc-directed cytoneme/cell $\pm$ SD | Av. # lateral cytoneme/cell $\pm$ SD | Av. # of non-polar small cells $\pm$ SD | Av. cell angle (av. Deg. $\pm$ SD) |
|---------------------------|---------------------------|------------|-------------|------------|--------------------------------------------|--------------------------------------|-----------------------------------------|------------------------------------|
| <i>htl&gt;FRT&gt;Gal4</i> | <i>UAS-CD8:GFP</i>        | 3          | p           | 41         | 3.2 $\pm$ 0.9                              | 0.0                                  | 0                                       | 83.2 $\pm$ 4.7                     |
|                           |                           |            | d           | 15         | 0                                          | 5.7 $\pm$ 1.3                        | 39.7 $\pm$ 21.9                         | 2.5 $\pm$ 3.2                      |
|                           | <i>Lifeact:GFP</i>        | 3          | p           | 25**       | 2.6 $\pm$ 0.9**                            | 0                                    | 0                                       | 85.7 $\pm$ 5.3                     |
|                           |                           |            | d           | 19         | 0                                          | 5.6 $\pm$ 1.8                        | 36.7 $\pm$ 9.5                          | 1.1 $\pm$ 1.2                      |
|                           | <i>Lifeact:GFP, dia-i</i> | 9          | p           | 0**        | 0**                                        | ND                                   | 0                                       | NA                                 |
|                           |                           |            | d           | NA         | NA                                         | ND                                   | 71.6 $\pm$ 66.3                         | NA                                 |
|                           | <i>Lifeact:GFP, htl-i</i> | 10         | p           | 0**        | 0**                                        | ND                                   | 0                                       | NA                                 |
|                           |                           |            | d           | 24         | 0                                          | 6.1 $\pm$ 1.7                        | 57.3 $\pm$ 37.4                         | 0.79 $\pm$ 1.2                     |

Note: \*, excludes non-polar spherical cells. p, proximal. d, distal. \*\*, p <0.01

(One-way ANOVA followed by Tukey HSD) comparing same myoblast layers between control (*htl>FRT>Gal4>Lifeact:GFP*) and *htl-i* and *dia-i*. Source data are provided as a Source Data file.

**Supplementary Table 3. Reagent list used in this study**

| REAGENT or RESOURCE                                                 | SOURCE                       | IDENTIFIER                                 |
|---------------------------------------------------------------------|------------------------------|--------------------------------------------|
| Antibodies                                                          |                              |                                            |
| Mouse anti-MAP Kinase, Activated (Diphosphorylated ERK-1&2) (1:250) | Sigma-Aldrich                | Cat# M-8159;<br>RRID:AB_477245             |
| Rabbit anti-PH3 (1:2000)                                            | Cell Signaling Technology    | Cat# 9701;<br>RRID:AB_331535               |
| Mouse anti-Cut (1:50)                                               | DSHB                         | Cat# 2B10;<br>RRID:AB_528186               |
| Mouse monoclonal anti-Discs large (1:100)                           | DSHB                         | Cat# 4F3 anti-discs large; RRID: AB_528203 |
| Mouse anti-Armadillo (1:100)                                        | DSHB                         | Cat# N2 7A1;<br>RRID:AB_528089             |
| Mouse anti-Wingless (1:50)                                          | DSHB                         | Cat# 4D4;<br>RRID:AB_528512                |
| Rat anti-Shotgun (1:50)                                             | DSHB                         | Cat# DCAD2;<br>RRID:AB_528120              |
| Rabbit anti-Twist (1:2000)                                          | <sup>1</sup>                 | N/A                                        |
| Rabbit anti-Vestigial (1:200)                                       | <sup>2</sup>                 | N/A                                        |
| Goat anti-Mouse IgG (H+L), Alexa Fluor 555                          | Thermo Fisher Scientific     | A21434                                     |
| Goat anti-Mouse IgG (H+L), Alexa Fluor 647                          | Thermo Fisher Scientific     | A28181                                     |
| Goat anti-Rat IgG (H+L), Alexa Fluor 647                            | Thermo Fisher Scientific     | A21247                                     |
| Goat anti-Rabbit IgG (H+L), Alexa Fluor 555                         | Thermo Fisher Scientific     | A21428                                     |
| Goat anti-Rabbit IgG (H+L), Alexa Fluor 647                         | Thermo Fisher Scientific     | A21244                                     |
| Bacterial and Virus Strains                                         |                              |                                            |
| DH5 Alpha                                                           |                              |                                            |
| Chemicals, Peptides, and Recombinant Proteins                       |                              |                                            |
| Phalloidin iFlor 555                                                | Abcam                        | Cat# ab176759                              |
| Phalloidin iFlor 647                                                | Abcam                        | Cat# ab176756                              |
| Sodium Cacodylate                                                   | Electron Microscopy Sciences | Cat# 12300                                 |
| Osmium Tetroxide                                                    | Electron Microscopy Sciences | Cat# 19140                                 |
| Potassium Ferricyanide                                              | Sigma-Aldrich                | Cat# 702587                                |
| Uranyl Acetate                                                      | Electron Microscopy Sciences | Cat# 22400                                 |
| Propylene Oxide                                                     | Electron Microscopy Sciences | Cat# 20401                                 |
| Low Viscosity Resin                                                 | Electron Microscopy Sciences | Cat# 14300                                 |

|                                                                                    |                              |                   |
|------------------------------------------------------------------------------------|------------------------------|-------------------|
| Lead Citrate                                                                       | Electron Microscopy Sciences | Cat# 17800        |
| Poly-L-lysine                                                                      | VWR                          | Cat# 48393241     |
| Critical Commercial Assays                                                         |                              |                   |
| CloneJET PCR Cloning Kit                                                           | Thermo Fisher Scientific     | Cat# K1231        |
| Gateway™ LR Clonase™ II Enzyme mix                                                 | Thermo Fisher Scientific     | Cat# 11791020     |
| Zymoclean Gel DNA Recovery Kit                                                     | Zymo Research                | Cat# D4007        |
| GeneJET Plasmid Miniprep Kit                                                       | ThermoFisher Scientific      | Cat# K0502        |
| GeneJET Plasmid Midiprep Kit                                                       | ThermoFisher Scientific      | Cat #K0481        |
| 2X PCR Premix                                                                      | Syd Labs                     | Cat# MB067-EQ2R-L |
| Deposited Data                                                                     |                              |                   |
| Raw data from all the figures                                                      | This paper                   |                   |
| Experimental Models: Organisms/Strains                                             |                              |                   |
| <i>D. melanogaster</i> : UAS-CD8:GFP                                               | BDSC                         | 5130              |
| <i>D. melanogaster</i> : UAS-CD8:GFP                                               | BDSC                         | 5137              |
| <i>D. melanogaster</i> : UAS-CD8:RFP                                               | BDSC                         | 32218             |
| <i>D. melanogaster</i> : UAS-mCherryCAAX                                           | BDSC                         | 59021             |
| <i>D. melanogaster</i> : lexO-mCherryCAAX                                          | <sup>3</sup>                 | N/A               |
| <i>D. melanogaster</i> : lexO-CD2:GFP                                              | BDSC                         | 66544             |
| <i>D. melanogaster</i> : UAS-Lifeact:GFP                                           | BDSC                         | 57326             |
| <i>D. melanogaster</i> : UAS-Eb1:GFP                                               | BDSC                         | 35512             |
| <i>D. melanogaster</i> : UAS-nls:GFP                                               | BDSC                         | 4776              |
| <i>D. melanogaster</i> : UAS-nls:mCherry                                           | BDSC                         | 38425             |
| <i>D. melanogaster</i> : UAS-Dia-GFP                                               | BDSC                         | 56751             |
| <i>D. melanogaster</i> : UAS-ΔDAD-Dia-GFP                                          | BDSC                         | 56752             |
| <i>D. melanogaster</i> : LexO-nsyb:GFP <sup>1-10</sup> , UAS-CD4:GFP <sup>11</sup> | <sup>4</sup>                 | N/A               |
| <i>D. melanogaster</i> : UAS-htl-DN                                                | BDSC                         | 5366              |
| <i>D. melanogaster</i> : UAS-htlACT                                                | BDSC                         | 5467              |
| <i>D. melanogaster</i> : UAS-pyrRNAi                                               | BDSC                         | 63547             |
| <i>D. melanogaster</i> : UAS-diaRNAi                                               | BDSC                         | 33424             |
| <i>D. melanogaster</i> : htl-Gal4                                                  | BDSC                         | 40669             |
| <i>D. melanogaster</i> : ths-Gal4                                                  | BDSC                         | 77475             |
| <i>D. melanogaster</i> : {nos-Cas9}ZH-2A                                           | BDSC                         | 54591             |
| <i>D. melanogaster</i> : hs-Flp                                                    | BDSC                         | 6                 |
| <i>D. melanogaster</i> : w <sup>1118</sup>                                         | BDSC                         | 3605              |
| <i>D. melanogaster</i> : htl:GFP <sup>TRG</sup>                                    | VDRRC                        | 318120            |
| <i>D. melanogaster</i> : UAS-htlRNAi                                               | VDRRC                        | 6692              |
| <i>D. melanogaster</i> : UAS-thsRNAi                                               | VDRRC                        | 24536             |
| <i>D. melanogaster</i> : dpp-Gal4                                                  | <sup>5</sup>                 | N/A               |
| <i>D. melanogaster</i> : LexO-Fz:mCherry                                           | <sup>5</sup>                 | N/A               |
| <i>D. melanogaster</i> : 1151-Gal4                                                 | <sup>5</sup>                 | N/A               |
| <i>D. melanogaster</i> : htl-LexA                                                  | This paper                   | N/A               |
| <i>D. melanogaster</i> : pyr-Gal4                                                  | This paper                   | N/A               |
| <i>D. melanogaster</i> : htl>FRT>stop>FRT>Gal4                                     | This paper                   | N/A               |



|                                                                                                                                                           |            |           |
|-----------------------------------------------------------------------------------------------------------------------------------------------------------|------------|-----------|
| <i>D. melanogaster</i> : LexO- <i>Htl</i> :mCherry                                                                                                        | This paper | N/A       |
| <i>D. melanogaster</i> : UAS- <i>Ths</i> :GFP                                                                                                             | This paper | N/A       |
| <i>D. melanogaster</i> : UAS- <i>Pyr</i> :GFP                                                                                                             | This paper | N/A       |
| Oligonucleotides                                                                                                                                          |            |           |
| Primer for cloning <i>pyr-Gal4</i> :<br>AGGACTTATATTACTGATGGTGAGTTTTGTCC                                                                                  | This paper | N/A       |
| Primer for cloning <i>pyr-Gal4</i> :<br>AATTCGAGCTCGGTACCCTTCTGCTATTGATCTGC<br>CAGCG                                                                      | This paper | N/A       |
| Primer for cloning <i>pyr-Gal4</i> :<br>GCCCAATGTCTCGAATTCGGCTCCGGCGAAGG<br>ACGCGGCAGCCTACTGACTTGCGGAGATGTCGAA<br>GAG<br>AACCTGGCCCTATGAAGCTACTGTCTTCTATC | This paper | N/A       |
| Primer for cloning <i>pyr-Gal4</i> :<br>CGCCGGAGCCGAATTCGACATTGGGCATGAACTT<br>GTGGAAC                                                                     | This paper | N/A       |
| Primer for cloning <i>pyr-Gal4</i> :<br>GCCAAGCTTGCATGCCTCTAGA<br>TGACATTCTGCAGATACGGGTAGTTC                                                              | This paper | N/A       |
| Primer used for <i>pyr-Gal4</i> screen:<br>GATCTCACGATCGGCCGTAATG                                                                                         | This paper | gRNAseqF2 |
| Primer used for <i>pyr-Gal4</i> screen:<br>GATTCGATTACACACTCAATCTCTCG                                                                                     | This paper | gRNASeqR1 |
| Primer used for <i>pyr-Gal4</i> screen:<br>GGATGCTATTAACCCTGAACTTTC                                                                                       | This paper | pJet seqR |
| Primer used for <i>pyr-Gal4</i> screen:<br>CGCAGGGGATTTCTCC                                                                                               | This paper | CseqF     |
| Primer used for <i>pyr-Gal4</i> screen:<br>CCAGATTGAAATCGCG                                                                                               | This paper | Seq2F     |
| Primer used for <i>pyr-Gal4</i> screen:<br>CCAATGGCTAATATGCAG                                                                                             | This paper | Seq2R     |
| gRNA for <i>pyr-Gal4</i> : ATAATATAAGTCCTGACATTGGG                                                                                                        | This paper | N/A       |
| Primer for cloning <i>htl-enh-FRT-stop-FRT3-FRT-FRT3-Gal4</i> : AATTCGAGCTCGGTACCGCTAGCGG<br>CAAGGAGAAATTCCAACGCAGAGAC                                    | This paper | N/A       |
| Primer for cloning <i>htl-enh-FRT-stop-FRT3-FRT-FRT3-Gal4</i> : GATGAACGGGTGGGGATGG                                                                       | This paper | N/A       |
| Primer for cloning <i>htl-enh-FRT-stop-FRT3-FRT-FRT3-Gal4</i> : CGAGACCGGCACGAGTCTG                                                                       | This paper | N/A       |
| Primer for cloning <i>htl-enh-FRT-stop-FRT3-FRT-FRT3-Gal4</i> : GGGAGATTTAAGAGAGGTAGAGAATC                                                                | This paper | N/A       |
| Primer for cloning <i>htl-enh-FRT-stop-FRT3-FRT-FRT3-Gal4</i> : TGTTCCAAATTGGTCCGCGTAGTCC                                                                 | This paper | N/A       |
| Primer for cloning <i>htl-enh-FRT-stop-FRT3-FRT-FRT3-Gal4</i> : CTACGCGGACCAATTTGGAACAACCAAACCG<br>AAAGACTTAATTTATATTTATTTAATTTAATAA<br>AAC               | This paper | N/A       |
| Primer for cloning <i>htl-enh-FRT-stop-FRT3-FRT-FRT3-Gal4</i> : GGCAAAAAAAAAACTGAGAATTTGC                                                                 | This paper | N/A       |
| Primer for cloning <i>htl-enh-FRT-stop-FRT3-FRT-FRT3-Gal4</i> :<br>GCCAAGCTTGCATGCCCTCCTCTATGCCTGAACCC<br>AGC                                             | This paper | N/A       |

|                                                                                                                      |            |       |
|----------------------------------------------------------------------------------------------------------------------|------------|-------|
| Primer for cloning <i>htl-LexA</i> :<br>CACCGCAAGGAGAAATTCCAACGCAGAGAC                                               | This paper | N/A   |
| Primer for cloning <i>htl-LexA</i> :<br>GCCAAGCTTGGCGAATTCTGTTCCAAATTGGTCCG<br>CGTAGTCC                              | This paper | N/A   |
| Primer for cloning <i>UAS-Htl:mcherry</i> :<br>AATTCGAGCTCGGTACCGAATTCATGGCTGCCGCC<br>TGG                            | This paper | N/A   |
| Primer for cloning <i>UAS-Htl:mcherry</i> :<br>GGATCTGATCAAATTTGCCACC                                                | This paper | N/A   |
| Primer for cloning <i>UAS-Htl:mcherry</i> :<br>CTGACGAGCACATTCCTGGC                                                  | This paper | N/A   |
| Primer for cloning <i>UAS-Htl:mcherry</i> :<br>GCCAAGCTTGCATGCCCTCGAGAT<br>AATTACACCACTTCTGCAGGTTGTCC                | This paper | N/A   |
| Primer for cloning <i>UAS-Pyr:GFP</i> :<br>AATTCGAGCTCGGTACCGCGGCCG<br>CATGTTCCACAAGTTCATGCCCAATG                    | This paper | N/A   |
| Primer for cloning <i>UAS-Pyr:GFP</i> :<br>AGCTCCTCGCCCTTGGACATG<br>GTTGTTGTGGTTGTTGTTGTTGTG                         | This paper | N/A   |
| Primer for cloning <i>UAS-Pyr:GFP</i> :<br>CAACAACAACCACAACAACCATGTCCAAGGGCGA<br>GGAGC                               | This paper | N/A   |
| Primer for cloning <i>UAS-Pyr:GFP</i> :<br>GCCAAGCTTGCATGCGCTAGC<br>TGGTGTCTTGTACAGCTCATCCATGCCC                     | This paper | N/A   |
| Primer for cloning <i>UAS-Pyr:GFP</i> :<br>GGCATGGATGAGCTGTACAAGACACCAGCTAGCC<br>CAGTGG                              | This paper | N/A   |
| Primer for cloning <i>UAS-Pyr:GFP</i> :<br>GCCAAGCTTGCATGCCGGATCCCTCGAGCTATAA<br>ATCTATATAATACAAGCTAACAAAATACTTACCAC | This paper | N/A   |
| Primer for cloning <i>UAS-Ths:GFP</i> :<br>AATTCGAGCTCGGTACCGCGGCCGCAT<br>GTCGAATCAGTTAGAGAGACTGCTG                  | This paper | N/A   |
| Primer for cloning <i>UAS-Ths:GFP</i> :<br>GCCGCCTTGCCCTCGACGCTCTTCTTGGGCCCC<br>ACAG                                 | This paper | N/A   |
| Primer for cloning <i>UAS-Ths:GFP</i> :<br>GTCGAGGGGCAAGGCGGCATGTCCAAGGGCGAG<br>GAGC                                 | This paper | N/A   |
| Primer for cloning <i>UAS-Ths:GFP</i> :<br>ATGTCCAAGGGCGAGGAGC                                                       | This paper | N/A   |
| Primer for cloning <i>UAS-Ths:GFP</i> :<br>ACTGCCGCCGCCACTGCCCTTGTACAGCTCATCCA<br>TGCCC                              | This paper | N/A   |
| Primer for cloning <i>UAS-Ths:GFP</i> :<br>GGCAGTGCGGGCGGCAGTGCAACGATGCCTGCT<br>ACATGTTC                             | This paper | N/A   |
| Primer for cloning <i>UAS-Ths:GFP</i> :<br>GCCAAGCTTGCATGCCTCTAGAC<br>TACGCAAATCTCTGATGAGTGAACC                      | This paper | N/A   |
| Recombinant DNA                                                                                                      |            |       |
| pUC19                                                                                                                | Addgene    | 50005 |

|                                      |                            |                                                                                                                                                                           |
|--------------------------------------|----------------------------|---------------------------------------------------------------------------------------------------------------------------------------------------------------------------|
| pUAS <sup>t</sup>                    | DGRC                       | 1000                                                                                                                                                                      |
| pACT-FRT-stop-FRT3-FRT-FRT3-Gal4     | Addgene                    | 52889                                                                                                                                                                     |
| pBPnlsLexA::p65Uw                    | Addgene                    | 26230                                                                                                                                                                     |
| pCFD3                                | <sup>6</sup>               | N/A                                                                                                                                                                       |
| pCFD3-pyr-Gal4-gRNA                  | This paper                 | N/A                                                                                                                                                                       |
| pJet1.2-pyr-T2A-Gal4                 | This paper                 | N/A                                                                                                                                                                       |
| pLot-Htl:mCherry                     | This paper                 | N/A                                                                                                                                                                       |
| pHtl-enh-FRT-stop-FRT3-FRT-FRT3-Gal4 | This paper                 | N/A                                                                                                                                                                       |
| pBP-htl-enh-nlsLexA::p65Uw           | This paper                 | N/A                                                                                                                                                                       |
| p{GMR93H07-Gal4}                     | <sup>7</sup>               | N/A                                                                                                                                                                       |
| Software and Algorithms              |                            |                                                                                                                                                                           |
| Fiji- ImageJ 1.52p                   | ImageJ                     | <a href="https://fiji.sc">https://fiji.sc</a>                                                                                                                             |
| Prism 8.0                            | GraphPad                   | <a href="https://www.graphpad.com/">https://www.graphpad.com/</a>                                                                                                         |
| Adobe Photoshop 22.5.1               | Adobe                      | <a href="https://www.adobe.com">https://www.adobe.com</a>                                                                                                                 |
| Adobe Illustrator 25.4.1             | Adobe                      | <a href="https://www.adobe.com">https://www.adobe.com</a>                                                                                                                 |
| Microsoft Excel (Version 2111)       | Microsoft                  | <a href="https://www.office.com">https://www.office.com</a>                                                                                                               |
| SnapGene 3.3.4                       | SnapGene                   | <a href="https://www.snapgene.com">https://www.snapgene.com</a>                                                                                                           |
| VassarStats                          |                            | <a href="http://vassarstats.net">vassarstats.net</a>                                                                                                                      |
| Imaris 9.5.0                         | Imaris                     | <a href="https://imaris.oxinst.com">https://imaris.oxinst.com</a>                                                                                                         |
| Matlab 2019b                         | MathWorks                  | <a href="https://mathworks.com">https://mathworks.com</a>                                                                                                                 |
| Andor iQ3                            | Oxford Instruments         | <a href="https://andor.oxinst.com/products/iq-live-cell-imaging-software/">https://andor.oxinst.com/products/iq-live-cell-imaging-software/</a>                           |
| Zen 3                                | Carl Zeiss Microscopy GmbH | <a href="https://www.zeiss.com/microscopy/int/home.html?vaURL=www.zeiss.com/microscopy">https://www.zeiss.com/microscopy/int/home.html?vaURL=www.zeiss.com/microscopy</a> |

## REFERENCES

1. Roth, S., Stein, D. & Nüsslein-Volhard, C. A gradient of nuclear localization of the dorsal protein determines dorsoventral pattern in the *Drosophila* embryo. *Cell* **59**, 1189–1202 (1989).
2. Williams, J. A., Bell, J. B. & Carroll, S. B. Control of *Drosophila* wing and haltere development by the nuclear vestigial gene product. *Genes & Development* **5**, 2481–2495 (1991).

3. Roy, S., Huang, H., Liu, S. & Kornberg, T. B. Cytoneme-mediated contact-dependent transport of the *Drosophila* decapentaplegic signaling protein. *Science* **343**, 1244624–1244624 (2014).
4. Du, L., Sohr, A., Yan, G. & Roy, S. Feedback regulation of cytoneme-mediated transport shapes a tissue-specific FGF morphogen gradient. (2018). doi:10.7554/eLife.38137
5. Huang, H. & Kornberg, T. B. Myoblast cytonemes mediate Wg signaling from the wing imaginal disc and Delta-Notch signaling to the air sac primordium. *Elife* **4**, e06114 (2015).
6. Port, F., Chen, H. M., Lee, T. & Bullock, S. L. *An optimized CRISPR/Cas toolbox for efficient germline and somatic genome engineering in Drosophila*. (2014). doi:10.1101/003541
7. Pfeiffer, B. D. *et al.* Tools for neuroanatomy and neurogenetics in *Drosophila*. *Proc. Natl. Acad. Sci. U.S.A.* **105**, 9715–9720 (2008).
